# Supplementary material for: Deciphering the Mechanism by Which Carbon Dioxide Extends the Shelf Life of Raw Milk: A Microbiomics- and Metabolomics-Based Approach
Source: Preprints.org preprint supplement (doi:10.20944/preprints202312.0363.v1), 2023-12-06
Supplement: Supplementary file 1 [file supplementary]

## Sheet: Microbiomics 
ProteinID	A_6d	D_6d		taxonomy
ko02030	303.385	156.341	-147.044	Cellular Processes;Cell motility;Bacterial chemotaxis
ko02025	113.563	23.8933	-89.6694	Cellular Processes;Cellular community - prokaryotes;Biofilm formation - Pseudomonas aeruginosa
ko02026	123.58	60.9311	-62.6489	Cellular Processes;Cellular community - prokaryotes;Biofilm formation - Escherichia coli
ko02024	64.7186	36.653	-28.0656	Cellular Processes;Cellular community - prokaryotes;Quorum sensing
ko04216	27.4951	0	-27.4951	Cellular Processes;Cell growth and death;Ferroptosis
ko04112	152.621	125.421	-27.2004	Cellular Processes;Cell growth and death;Cell cycle - Caulobacter
ko04136	26.8127	0	-26.8127	Cellular Processes;Transport and catabolism;Autophagy - other
ko05111	73.6432	50.2949	-23.3484	Cellular Processes;Cellular community - prokaryotes;Biofilm formation - Vibrio cholerae
ko04146	59.5398	40.437	-19.1029	Cellular Processes;Transport and catabolism;Peroxisome
ko04138	25.1318	6.5615	-18.5703	Cellular Processes;Transport and catabolism;Autophagy - yeast
ko04111	19.4095	4.14467	-15.2648	Cellular Processes;Cell growth and death;Cell cycle - yeast
ko04110	13.6098	0	-13.6098	Cellular Processes;Cell growth and death;Cell cycle
ko04139	30.3703	16.8249	-13.5454	Cellular Processes;Transport and catabolism;Mitophagy - yeast
ko04113	20.4379	6.9256	-13.5123	Cellular Processes;Cell growth and death;Meiosis - yeast
ko04137	7.476	0	-7.476	Cellular Processes;Transport and catabolism;Mitophagy - animal
ko04214	18.3333	12.9759	-5.35737	Cellular Processes;Cell growth and death;Apoptosis - fly
ko04810	5.219	0	-5.219	Cellular Processes;Cell motility;Regulation of actin cytoskeleton
ko04218	5.00897	0	-5.00897	Cellular Processes;Cell growth and death;Cellular senescence
ko04144	12.2607	7.5874	-4.6733	Cellular Processes;Transport and catabolism;Endocytosis
ko04142	8.18003	6.7654	-1.41463	Cellular Processes;Transport and catabolism;Lysosome
ko04550	1.00823	0	-1.00823	Cellular Processes;Cellular community - eukaryotes;Signaling pathways regulating pluripotency of stem cells
ko02040	115.028	117.926	2.89857	Cellular Processes;Cell motility;Flagellar assembly
ko04210	8.01633	23.4266	15.4103	Cellular Processes;Cell growth and death;Apoptosis
ko04145	0	22.214	22.214	Cellular Processes;Transport and catabolism;Phagosome
ko02010	89.9866	34.9458	-55.0408	Environmental Information Processing;Membrane transport;ABC transporters
ko03070	188.381	135.24	-53.1409	Environmental Information Processing;Membrane transport;Bacterial secretion system
ko02020	98.2808	52.9614	-45.3194	Environmental Information Processing;Signal transduction;Two-component system
ko04011	35.7988	19.3029	-16.4959	Environmental Information Processing;Signal transduction;MAPK signaling pathway - yeast
ko02060	47.4879	34.1641	-13.3238	Environmental Information Processing;Membrane transport;Phosphotransferase system (PTS)
ko04013	11.6521	0	-11.6521	Environmental Information Processing;Signal transduction;MAPK signaling pathway - fly
ko04150	11.0404	3.41173	-7.62867	Environmental Information Processing;Signal transduction;mTOR signaling pathway
ko04014	5.39793	0	-5.39793	Environmental Information Processing;Signal transduction;Ras signaling pathway
ko04391	5.04153	0	-5.04153	Environmental Information Processing;Signal transduction;Hippo signaling pathway - fly
ko04392	4.82697	0	-4.82697	Environmental Information Processing;Signal transduction;Hippo signaling pathway - multiple species
ko04310	3.14893	0	-3.14893	Environmental Information Processing;Signal transduction;Wnt signaling pathway
ko04020	2.48213	0	-2.48213	Environmental Information Processing;Signal transduction;Calcium signaling pathway
ko04152	19.6587	20.67	1.0113	Environmental Information Processing;Signal transduction;AMPK signaling pathway
ko04022	0	1.377	1.377	Environmental Information Processing;Signal transduction;cGMP-PKG signaling pathway
ko04151	5.52817	8.51857	2.9904	Environmental Information Processing;Signal transduction;PI3K-Akt signaling pathway
ko04010	4.10073	13.0749	8.9742	Environmental Information Processing;Signal transduction;MAPK signaling pathway
ko04068	0	12.7247	12.7247	Environmental Information Processing;Signal transduction;FoxO signaling pathway
ko04122	119.657	60.4329	-59.2238	Genetic Information Processing;Folding, sorting and degradation;Sulfur relay system
ko03060	151.882	115.282	-36.6006	Genetic Information Processing;Folding, sorting and degradation;Protein export
ko03020	57.3507	27.492	-29.8587	Genetic Information Processing;Transcription;RNA polymerase
ko03008	31.0526	8.35397	-22.6986	Genetic Information Processing;Translation;Ribosome biogenesis in eukaryotes
ko03420	94.7034	74.6531	-20.0504	Genetic Information Processing;Replication and repair;Nucleotide excision repair
ko03022	19.9759	1.18473	-18.7912	Genetic Information Processing;Transcription;Basal transcription factors
ko03015	20.2291	4.53413	-15.6949	Genetic Information Processing;Translation;mRNA surveillance pathway
ko03050	16.0625	2.6425	-13.42	Genetic Information Processing;Folding, sorting and degradation;Proteasome
ko03018	91.3833	79.5393	-11.844	Genetic Information Processing;Folding, sorting and degradation;RNA degradation
ko03410	109.229	97.5787	-11.6499	Genetic Information Processing;Replication and repair;Base excision repair
ko03460	12.6028	1.37697	-11.2259	Genetic Information Processing;Replication and repair;Fanconi anemia pathway
ko04130	9.39707	2.44127	-6.9558	Genetic Information Processing;Folding, sorting and degradation;SNARE interactions in vesicular transport
ko03040	16.1141	10.9111	-5.20303	Genetic Information Processing;Transcription;Spliceosome
ko03013	21.7042	17.6243	-4.07997	Genetic Information Processing;Translation;RNA transport
ko03430	175.245	174.471	-0.774667	Genetic Information Processing;Replication and repair;Mismatch repair
ko03440	130.349	130.476	0.1278	Genetic Information Processing;Replication and repair;Homologous recombination
ko04141	17.6534	19.8316	2.17827	Genetic Information Processing;Folding, sorting and degradation;Protein processing in endoplasmic reticulum
ko04120	10.4534	17.6851	7.23173	Genetic Information Processing;Folding, sorting and degradation;Ubiquitin mediated proteolysis
ko03030	122.662	130.754	8.0916	Genetic Information Processing;Replication and repair;DNA replication
ko03450	22.8251	31.1455	8.32033	Genetic Information Processing;Replication and repair;Non-homologous end-joining
ko00970	148.223	176.745	28.5211	Genetic Information Processing;Translation;Aminoacyl-tRNA biosynthesis
ko03010	121.825	159.606	37.7817	Genetic Information Processing;Translation;Ribosome
ko00903	145.792	0	-145.792	Metabolism;Metabolism of terpenoids and polyketides;Limonene and pinene degradation
ko00710	140.02	0	-140.02	Metabolism;Energy metabolism;Carbon fixation in photosynthetic organisms
ko00983	127.303	0	-127.303	Metabolism;Xenobiotics biodegradation and metabolism;Drug metabolism - other enzymes
ko00660	113.385	0	-113.385	Metabolism;Carbohydrate metabolism;C5-Branched dibasic acid metabolism
ko00410	96.4154	0	-96.4154	Metabolism;Metabolism of other amino acids;beta-Alanine metabolism
ko00261	88.5951	0	-88.5951	Metabolism;Biosynthesis of other secondary metabolites;Monobactam biosynthesis
ko00930	77.0124	0	-77.0124	Metabolism;Xenobiotics biodegradation and metabolism;Caprolactam degradation
ko00643	76.4966	0	-76.4966	Metabolism;Xenobiotics biodegradation and metabolism;Styrene degradation
ko00281	139.65	63.7873	-75.8625	Metabolism;Metabolism of terpenoids and polyketides;Geraniol degradation
ko00471	151.665	77.869	-73.7957	Metabolism;Metabolism of other amino acids;D-Glutamine and D-glutamate metabolism
ko00460	67.7291	0	-67.7291	Metabolism;Metabolism of other amino acids;Cyanoamino acid metabolism
ko00920	99.7284	34.9533	-64.7752	Metabolism;Energy metabolism;Sulfur metabolism
ko00220	132.792	72.7637	-60.028	Metabolism;Amino acid metabolism;Arginine biosynthesis
ko00362	70.7069	12.6714	-58.0355	Metabolism;Xenobiotics biodegradation and metabolism;Benzoate degradation
ko00770	149.146	93.5657	-55.5806	Metabolism;Metabolism of cofactors and vitamins;Pantothenate and CoA biosynthesis
ko00910	99.0338	44.2589	-54.775	Metabolism;Energy metabolism;Nitrogen metabolism
ko00250	169.849	116.717	-53.1315	Metabolism;Amino acid metabolism;Alanine, aspartate and glutamate metabolism
ko00340	121.951	69.3107	-52.6401	Metabolism;Amino acid metabolism;Histidine metabolism
ko00360	92.5595	40.7663	-51.7932	Metabolism;Amino acid metabolism;Phenylalanine metabolism
ko00071	111.717	60.479	-51.2379	Metabolism;Lipid metabolism;Fatty acid degradation
ko00630	134.788	87.4589	-47.3291	Metabolism;Carbohydrate metabolism;Glyoxylate and dicarboxylate metabolism
ko00290	252.928	205.824	-47.1037	Metabolism;Amino acid metabolism;Valine, leucine and isoleucine biosynthesis
ko00540	107.317	61.9872	-45.3299	Metabolism;Glycan biosynthesis and metabolism;Lipopolysaccharide biosynthesis
ko00280	119.668	75.8182	-43.8498	Metabolism;Amino acid metabolism;Valine, leucine and isoleucine degradation
ko00791	43.7445	0	-43.7445	Metabolism;Xenobiotics biodegradation and metabolism;Atrazine degradation
ko00310	65.7204	23.0051	-42.7153	Metabolism;Amino acid metabolism;Lysine degradation
ko00473	177.662	135.137	-42.5253	Metabolism;Metabolism of other amino acids;D-Alanine metabolism
ko00860	76.2557	33.9906	-42.2652	Metabolism;Metabolism of cofactors and vitamins;Porphyrin and chlorophyll metabolism
ko00072	216.661	176.57	-40.0907	Metabolism;Lipid metabolism;Synthesis and degradation of ketone bodies
ko00020	146.814	110.371	-36.4427	Metabolism;Carbohydrate metabolism;Citrate cycle (TCA cycle)
ko00730	116.691	83.1998	-33.491	Metabolism;Metabolism of cofactors and vitamins;Thiamine metabolism
ko00053	41.7814	8.8161	-32.9653	Metabolism;Carbohydrate metabolism;Ascorbate and aldarate metabolism
ko00260	130.908	98.0165	-32.8919	Metabolism;Amino acid metabolism;Glycine, serine and threonine metabolism
ko00380	93.9957	61.2742	-32.7214	Metabolism;Amino acid metabolism;Tryptophan metabolism
ko00780	226.516	194.197	-32.3187	Metabolism;Metabolism of cofactors and vitamins;Biotin metabolism
ko00750	103.02	71.0884	-31.932	Metabolism;Metabolism of cofactors and vitamins;Vitamin B6 metabolism
ko00030	112.208	81.5283	-30.6798	Metabolism;Carbohydrate metabolism;Pentose phosphate pathway
ko00627	32.6555	2.0657	-30.5898	Metabolism;Xenobiotics biodegradation and metabolism;Aminobenzoate degradation
ko00523	29.9968	0	-29.9968	Metabolism;Metabolism of terpenoids and polyketides;Polyketide sugar unit biosynthesis
ko00640	85.5508	55.7362	-29.8146	Metabolism;Carbohydrate metabolism;Propanoate metabolism
ko00521	164.64	134.846	-29.794	Metabolism;Biosynthesis of other secondary metabolites;Streptomycin biosynthesis
ko00620	138.249	108.561	-29.6881	Metabolism;Carbohydrate metabolism;Pyruvate metabolism
ko00330	83.5196	54.0159	-29.5037	Metabolism;Amino acid metabolism;Arginine and proline metabolism
ko00626	27.9192	0	-27.9192	Metabolism;Xenobiotics biodegradation and metabolism;Naphthalene degradation
ko00440	39.4706	11.7231	-27.7475	Metabolism;Metabolism of other amino acids;Phosphonate and phosphinate metabolism
ko00650	94.8614	67.1468	-27.7146	Metabolism;Carbohydrate metabolism;Butanoate metabolism
ko00010	126.225	98.9182	-27.3063	Metabolism;Carbohydrate metabolism;Glycolysis / Gluconeogenesis
ko00592	27.2811	0	-27.2811	Metabolism;Lipid metabolism;alpha-Linolenic acid metabolism
ko00472	27.0657	0	-27.0657	Metabolism;Metabolism of other amino acids;D-Arginine and D-ornithine metabolism
ko00350	65.5012	39.086	-26.4152	Metabolism;Amino acid metabolism;Tyrosine metabolism
ko00670	145.61	119.263	-26.3473	Metabolism;Metabolism of cofactors and vitamins;One carbon pool by folate
ko00564	72.7387	46.3925	-26.3462	Metabolism;Lipid metabolism;Glycerophospholipid metabolism
ko00562	43.4141	18.3172	-25.0969	Metabolism;Carbohydrate metabolism;Inositol phosphate metabolism
ko00230	97.9042	73.0463	-24.8579	Metabolism;Nucleotide metabolism;Purine metabolism
ko00790	92.0222	67.6125	-24.4097	Metabolism;Metabolism of cofactors and vitamins;Folate biosynthesis
ko00480	123.639	100.864	-22.7752	Metabolism;Metabolism of other amino acids;Glutathione metabolism
ko00051	62.1519	40.0437	-22.1082	Metabolism;Carbohydrate metabolism;Fructose and mannose metabolism
ko00760	73.9493	52.2498	-21.6996	Metabolism;Metabolism of cofactors and vitamins;Nicotinate and nicotinamide metabolism
ko00561	52.6815	31.1161	-21.5654	Metabolism;Lipid metabolism;Glycerolipid metabolism
ko00565	20.6296	0	-20.6296	Metabolism;Lipid metabolism;Ether lipid metabolism
ko00785	56.769	37.2846	-19.4844	Metabolism;Metabolism of cofactors and vitamins;Lipoic acid metabolism
ko00270	105.884	87.4817	-18.4027	Metabolism;Amino acid metabolism;Cysteine and methionine metabolism
ko00361	25.18	7.862	-17.318	Metabolism;Xenobiotics biodegradation and metabolism;Chlorocyclohexane and chlorobenzene degradation
ko00240	114.097	97.4306	-16.6662	Metabolism;Nucleotide metabolism;Pyrimidine metabolism
ko00740	57.0069	41.2501	-15.7568	Metabolism;Metabolism of cofactors and vitamins;Riboflavin metabolism
ko00040	33.9613	18.7175	-15.2438	Metabolism;Carbohydrate metabolism;Pentose and glucuronate interconversions
ko00130	66.6409	52.7996	-13.8413	Metabolism;Metabolism of cofactors and vitamins;Ubiquinone and other terpenoid-quinone biosynthesis
ko00984	13.2716	0	-13.2716	Metabolism;Xenobiotics biodegradation and metabolism;Steroid degradation
ko00520	72.2648	59.1003	-13.1644	Metabolism;Carbohydrate metabolism;Amino sugar and nucleotide sugar metabolism
ko00300	100.945	88.9653	-11.9792	Metabolism;Amino acid metabolism;Lysine biosynthesis
ko00960	62.5158	50.7531	-11.7626	Metabolism;Biosynthesis of other secondary metabolites;Tropane, piperidine and pyridine alkaloid biosynthesis
ko00100	13.9633	2.2736	-11.6897	Metabolism;Lipid metabolism;Steroid biosynthesis
ko00563	14.0428	3.14433	-10.8985	Metabolism;Glycan biosynthesis and metabolism;Glycosylphosphatidylinositol (GPI)-anchor biosynthesis
ko00365	10.216	0	-10.216	Metabolism;Xenobiotics biodegradation and metabolism;Furfural degradation
ko00513	13.5491	4.33127	-9.2178	Metabolism;Glycan biosynthesis and metabolism;Various types of N-glycan biosynthesis
ko00061	167.016	157.823	-9.1927	Metabolism;Lipid metabolism;Fatty acid biosynthesis
ko00680	41.3532	33.0187	-8.33443	Metabolism;Energy metabolism;Methane metabolism
ko00965	53.2589	44.9389	-8.32003	Metabolism;Biosynthesis of other secondary metabolites;Betalain biosynthesis
ko00510	16.3595	8.10207	-8.2574	Metabolism;Glycan biosynthesis and metabolism;N-Glycan biosynthesis
ko00120	7.9668	0	-7.9668	Metabolism;Lipid metabolism;Primary bile acid biosynthesis
ko00997	10.1281	2.2711	-7.85697	Metabolism;Biosynthesis of other secondary metabolites;Biosynthesis of various secondary metabolites - part 3
ko00400	95.8016	88.7965	-7.0051	Metabolism;Amino acid metabolism;Phenylalanine, tyrosine and tryptophan biosynthesis
ko00550	152.923	146.016	-6.90623	Metabolism;Glycan biosynthesis and metabolism;Peptidoglycan biosynthesis
ko00633	12.8728	6.61093	-6.26187	Metabolism;Xenobiotics biodegradation and metabolism;Nitrotoluene degradation
ko01040	33.2696	29.4522	-3.81747	Metabolism;Lipid metabolism;Biosynthesis of unsaturated fatty acids
ko00571	2.81053	0	-2.81053	Metabolism;Glycan biosynthesis and metabolism;Lipoarabinomannan (LAM) biosynthesis
ko00900	73.1186	70.8074	-2.3112	Metabolism;Metabolism of terpenoids and polyketides;Terpenoid backbone biosynthesis
ko00514	5.1446	3.9963	-1.1483	Metabolism;Glycan biosynthesis and metabolism;Other types of O-glycan biosynthesis
ko00450	109.192	109.156	-0.036	Metabolism;Metabolism of other amino acids;Selenocompound metabolism
ko00906	1.3159	1.34147	0.0255667	Metabolism;Metabolism of terpenoids and polyketides;Carotenoid biosynthesis
ko01053	26.9582	27.2835	0.325267	Metabolism;Metabolism of terpenoids and polyketides;Biosynthesis of siderophore group nonribosomal peptides
ko00591	11.1392	12.1437	1.0045	Metabolism;Lipid metabolism;Linoleic acid metabolism
ko00121	47.4246	50.7015	3.27683	Metabolism;Lipid metabolism;Secondary bile acid biosynthesis
ko00908	30.2758	36.6562	6.38037	Metabolism;Metabolism of terpenoids and polyketides;Zeatin biosynthesis
ko00590	10.4578	17.9137	7.4559	Metabolism;Lipid metabolism;Arachidonic acid metabolism
ko00600	20.6644	28.4349	7.77057	Metabolism;Lipid metabolism;Sphingolipid metabolism
ko00940	6.5379	16.5805	10.0426	Metabolism;Biosynthesis of other secondary metabolites;Phenylpropanoid biosynthesis
ko00572	7.15617	18.0576	10.9014	Metabolism;Glycan biosynthesis and metabolism;Arabinogalactan biosynthesis - Mycobacterium
ko00500	78.8188	89.8304	11.0116	Metabolism;Carbohydrate metabolism;Starch and sucrose metabolism
ko00052	59.6095	75.0154	15.4059	Metabolism;Carbohydrate metabolism;Galactose metabolism
ko00190	65.695	89.134	23.4389	Metabolism;Energy metabolism;Oxidative phosphorylation
ko00311	16.2979	46.2662	29.9683	Metabolism;Biosynthesis of other secondary metabolites;Penicillin and cephalosporin biosynthesis
ko00511	31.7345	67.2821	35.5476	Metabolism;Glycan biosynthesis and metabolism;Other glycan degradation
ko04212	76.7402	28.4778	-48.2624	Organismal Systems;Aging;Longevity regulating pathway - worm
ko04922	40.4959	0	-40.4959	Organismal Systems;Endocrine system;Glucagon signaling pathway
ko04964	19.0792	0	-19.0792	Organismal Systems;Excretory system;Proximal tubule bicarbonate reclamation
ko04714	16.2655	0	-16.2655	Organismal Systems;Environmental adaptation;Thermogenesis
ko04721	12.322	0	-12.322	Organismal Systems;Nervous system;Synaptic vesicle cycle
ko04919	12.0043	0	-12.0043	Organismal Systems;Endocrine system;Thyroid hormone signaling pathway
ko04657	5.7836	0	-5.7836	Organismal Systems;Immune system;IL-17 signaling pathway
ko04722	4.40877	0	-4.40877	Organismal Systems;Nervous system;Neurotrophin signaling pathway
ko04979	3.9791	0	-3.9791	Organismal Systems;Digestive system;Cholesterol metabolism
ko04626	27.9775	24.0416	-3.93583	Organismal Systems;Environmental adaptation;Plant-pathogen interaction
ko04910	16.2989	12.9364	-3.36243	Organismal Systems;Endocrine system;Insulin signaling pathway
ko04622	3.26473	0	-3.26473	Organismal Systems;Immune system;RIG-I-like receptor signaling pathway
ko04978	34.3327	31.8652	-2.4675	Organismal Systems;Digestive system;Mineral absorption
ko04062	2.04843	0	-2.04843	Organismal Systems;Immune system;Chemokine signaling pathway
ko04928	3.56373	1.92207	-1.64167	Organismal Systems;Endocrine system;Parathyroid hormone synthesis, secretion and action
ko03320	36.8699	36.476	-0.3939	Organismal Systems;Endocrine system;PPAR signaling pathway
ko04361	3.80237	5.07017	1.2678	Organismal Systems;Development and regeneration;Axon regeneration
ko04974	1.2256	6.5664	5.3408	Organismal Systems;Digestive system;Protein digestion and absorption
ko04962	0	8.48963	8.48963	Organismal Systems;Excretory system;Vasopressin-regulated water reabsorption
ko04213	45.7623	56.9663	11.204	Organismal Systems;Aging;Longevity regulating pathway - multiple species
ko04614	11.9608	24.1593	12.1985	Organismal Systems;Endocrine system;Renin-angiotensin system
ko04740	4.4243	23.1977	18.7734	Organismal Systems;Sensory system;Olfactory transduction
ko04260	14.5244	36.6309	22.1065	Organismal Systems;Circulatory system;Cardiac muscle contraction

## Sheet: metabolomics 
ID	Description	MetaboRatio	BgRatio	pvalue	p.adjust	qvalue	KEGGID	Count	KEGGID(LOG2FC)	RichFactor	URL	SecondClass	TopClass
bta04216	Ferroptosis	2/62	29/4294	0.0649088	0.160797	0.111805	C00025/C00418	2	C00025(-0.235)/C00418(-0.758)	4.78	https://www.kegg.jp/kegg-bin/show_pathway?map=bta04216&multi_query=cpd:C00025+yellow%0d%0acpd:C00418+yellow	Cell growth and death	Cellular Processes
bta04114	Oocyte meiosis	1/62	4/4294	0.0565355	0.154059	0.10712	C00410	1	C00410(-0.410)	17.31	https://www.kegg.jp/kegg-bin/show_pathway?map=bta04114&multi_query=cpd:C00410+yellow	Cell growth and death	Cellular Processes
bta04540	Gap junction	1/62	11/4294	0.148003	0.230461	0.160244	C00025	1	C00025(-0.235)	6.3	https://www.kegg.jp/kegg-bin/show_pathway?map=bta04540&multi_query=cpd:C00025+yellow	Cellular community - eukaryotes	Cellular Processes
bta02010	ABC transporters	10/62	138/4294	2.1875e-05	0.00079479	0.000552631	C00719/C00062/C00025/C00120/C00093/C00299/C00475/C00881/C00079/C01181	10	C00719(1.241)/C00062(-0.702)/C00025(-0.235)/C00120(-1.131)/C00093(0.546)/C00299(-0.978)/C00475(0.748)/C00881(-0.674)/C00079(-2.501)/C01181(0.126)	5.02	https://www.kegg.jp/kegg-bin/show_pathway?map=bta02010&multi_query=cpd:C00719+purple%0d%0acpd:C00062+yellow%0d%0acpd:C00025+yellow%0d%0acpd:C00120+yellow%0d%0acpd:C00093+purple%0d%0acpd:C00299+yellow%0d%0acpd:C00475+purple%0d%0acpd:C00881+yellow%0d%0acpd:C00079+yellow%0d%0acpd:C01181+purple	Membrane transport	Environmental Information Processing
bta04150	mTOR signaling pathway	1/62	4/4294	0.0565355	0.154059	0.10712	C00062	1	C00062(-0.702)	17.31	https://www.kegg.jp/kegg-bin/show_pathway?map=bta04150&multi_query=cpd:C00062+yellow	Signal transduction	Environmental Information Processing
bta04068	FoxO signaling pathway	1/62	5/4294	0.0701706	0.169301	0.117718	C00025	1	C00025(-0.235)	13.85	https://www.kegg.jp/kegg-bin/show_pathway?map=bta04068&multi_query=cpd:C00025+yellow	Signal transduction	Environmental Information Processing
bta04072	Phospholipase D signaling pathway	1/62	11/4294	0.148003	0.230461	0.160244	C00025	1	C00025(-0.235)	6.3	https://www.kegg.jp/kegg-bin/show_pathway?map=bta04072&multi_query=cpd:C00025+yellow	Signal transduction	Environmental Information Processing
bta04066	HIF-1 signaling pathway	1/62	15/4294	0.196292	0.263932	0.183516	C00022	1	C00022(-0.669)	4.62	https://www.kegg.jp/kegg-bin/show_pathway?map=bta04066&multi_query=cpd:C00022+yellow	Signal transduction	Environmental Information Processing
bta04152	AMPK signaling pathway	1/62	22/4294	0.274402	0.339884	0.236327	C00022	1	C00022(-0.669)	3.15	https://www.kegg.jp/kegg-bin/show_pathway?map=bta04152&multi_query=cpd:C00022+yellow	Signal transduction	Environmental Information Processing
bta04080	Neuroactive ligand-receptor interaction	1/62	52/4294	0.53273	0.56929	0.395837	C00025	1	C00025(-0.235)	1.33	https://www.kegg.jp/kegg-bin/show_pathway?map=bta04080&multi_query=cpd:C00025+yellow	Signaling molecules and interaction	Environmental Information Processing
bta00970	Aminoacyl-tRNA biosynthesis	4/62	52/4294	0.00635681	0.036468	0.0253568	C00062/C00025/C00082/C00079	4	C00062(-0.702)/C00025(-0.235)/C00082(-0.328)/C00079(-2.501)	5.33	https://www.kegg.jp/kegg-bin/show_pathway?map=bta00970&multi_query=cpd:C00062+yellow%0d%0acpd:C00025+yellow%0d%0acpd:C00082+yellow%0d%0acpd:C00079+yellow	Translation	Genetic Information Processing
bta05230	Central carbon metabolism in cancer	7/62	37/4294	6.7892e-07	3.70011e-05	2.57275e-05	C00062/C00074/C00025/C00082/C00149/C00079/C00022	7	C00062(-0.702)/C00074(-1.618)/C00025(-0.235)/C00082(-0.328)/C00149(-0.331)/C00079(-2.501)/C00022(-0.669)	13.1	https://www.kegg.jp/kegg-bin/show_pathway?map=bta05230&multi_query=cpd:C00062+yellow%0d%0acpd:C00074+yellow%0d%0acpd:C00025+yellow%0d%0acpd:C00082+yellow%0d%0acpd:C00149+yellow%0d%0acpd:C00079+yellow%0d%0acpd:C00022+yellow	Cancer: overview	Human Diseases
bta05231	Choline metabolism in cancer	3/62	11/4294	0.000435637	0.00949688	0.00660334	C00588/C00093/C04230	3	C00588(-1.469)/C00093(0.546)/C04230(2.022)	18.89	https://www.kegg.jp/kegg-bin/show_pathway?map=bta05231&multi_query=cpd:C00588+yellow%0d%0acpd:C00093+purple%0d%0acpd:C04230+purple	Cancer: overview	Human Diseases
bta05207	Chemical carcinogenesis - receptor activation	3/62	29/4294	0.00801836	0.0397273	0.0276231	C14240/C03690/C00410	3	C14240(-2.829)/C03690(3.298)/C00410(-0.410)	7.16	https://www.kegg.jp/kegg-bin/show_pathway?map=bta05207&multi_query=cpd:C14240+yellow%0d%0acpd:C03690+purple%0d%0acpd:C00410+yellow	Cancer: overview	Human Diseases
bta05030	Cocaine addiction	2/62	7/4294	0.00411175	0.0344048	0.0239222	C00025/C00082	2	C00025(-0.235)/C00082(-0.328)	19.79	https://www.kegg.jp/kegg-bin/show_pathway?map=bta05030&multi_query=cpd:C00025+yellow%0d%0acpd:C00082+yellow	Substance dependence	Human Diseases
bta05031	Amphetamine addiction	2/62	9/4294	0.00691866	0.0376972	0.0262115	C00025/C00082	2	C00025(-0.235)/C00082(-0.328)	15.39	https://www.kegg.jp/kegg-bin/show_pathway?map=bta05031&multi_query=cpd:C00025+yellow%0d%0acpd:C00082+yellow	Substance dependence	Human Diseases
bta05034	Alcoholism	2/62	10/4294	0.0085683	0.0406063	0.0282342	C00025/C00082	2	C00025(-0.235)/C00082(-0.328)	13.85	https://www.kegg.jp/kegg-bin/show_pathway?map=bta05034&multi_query=cpd:C00025+yellow%0d%0acpd:C00082+yellow	Substance dependence	Human Diseases
bta05146	Amoebiasis	2/62	13/4294	0.0144441	0.0542898	0.0377486	C00062/C01074	2	C00062(-0.702)/C01074(-0.667)	10.66	https://www.kegg.jp/kegg-bin/show_pathway?map=bta05146&multi_query=cpd:C00062+yellow%0d%0acpd:C01074+yellow	Infectious disease: parasitic	Human Diseases
bta05014	Amyotrophic lateral sclerosis	2/62	14/4294	0.0166961	0.0606626	0.0421797	C00062/C00025	2	C00062(-0.702)/C00025(-0.235)	9.89	https://www.kegg.jp/kegg-bin/show_pathway?map=bta05014&multi_query=cpd:C00062+yellow%0d%0acpd:C00025+yellow	Neurodegenerative disease	Human Diseases
bta05200	Pathways in cancer	2/62	31/4294	0.0730015	0.169301	0.117718	C00410/C00149	2	C00410(-0.410)/C00149(-0.331)	4.47	https://www.kegg.jp/kegg-bin/show_pathway?map=bta05200&multi_query=cpd:C00410+yellow%0d%0acpd:C00149+yellow	Cancer: overview	Human Diseases
bta05022	Pathways of neurodegeneration - multiple diseases	2/62	32/4294	0.0771646	0.171652	0.119352	C00062/C00025	2	C00062(-0.702)/C00025(-0.235)	4.33	https://www.kegg.jp/kegg-bin/show_pathway?map=bta05022&multi_query=cpd:C00062+yellow%0d%0acpd:C00025+yellow	Neurodegenerative disease	Human Diseases
bta05415	Diabetic cardiomyopathy	2/62	39/4294	0.108213	0.199694	0.138851	C00318/C00022	2	C00318(0.108)/C00022(-0.669)	3.55	https://www.kegg.jp/kegg-bin/show_pathway?map=bta05415&multi_query=cpd:C00318+purple%0d%0acpd:C00022+yellow	Cardiovascular disease	Human Diseases
bta05211	Renal cell carcinoma	1/62	3/4294	0.0427036	0.1301	0.0904603	C00149	1	C00149(-0.331)	23.09	https://www.kegg.jp/kegg-bin/show_pathway?map=bta05211&multi_query=cpd:C00149+yellow	Cancer: specific types	Human Diseases
bta05224	Breast cancer	1/62	3/4294	0.0427036	0.1301	0.0904603	C00410	1	C00410(-0.410)	23.09	https://www.kegg.jp/kegg-bin/show_pathway?map=bta05224&multi_query=cpd:C00410+yellow	Cancer: specific types	Human Diseases
bta04930	Type II diabetes mellitus	1/62	6/4294	0.0836118	0.171956	0.119564	C00022	1	C00022(-0.669)	11.54	https://www.kegg.jp/kegg-bin/show_pathway?map=bta04930&multi_query=cpd:C00022+yellow	Endocrine and metabolic disease	Human Diseases
bta05016	Huntington disease	1/62	6/4294	0.0836118	0.171956	0.119564	C00025	1	C00025(-0.235)	11.54	https://www.kegg.jp/kegg-bin/show_pathway?map=bta05016&multi_query=cpd:C00025+yellow	Neurodegenerative disease	Human Diseases
bta05142	Chagas disease	1/62	6/4294	0.0836118	0.171956	0.119564	C00062	1	C00062(-0.702)	11.54	https://www.kegg.jp/kegg-bin/show_pathway?map=bta05142&multi_query=cpd:C00062+yellow	Infectious disease: parasitic	Human Diseases
bta05017	Spinocerebellar ataxia	1/62	7/4294	0.0968619	0.188535	0.131091	C00025	1	C00025(-0.235)	9.89	https://www.kegg.jp/kegg-bin/show_pathway?map=bta05017&multi_query=cpd:C00025+yellow	Neurodegenerative disease	Human Diseases
bta05033	Nicotine addiction	1/62	7/4294	0.0968619	0.188535	0.131091	C00025	1	C00025(-0.235)	9.89	https://www.kegg.jp/kegg-bin/show_pathway?map=bta05033&multi_query=cpd:C00025+yellow	Substance dependence	Human Diseases
bta05143	African trypanosomiasis	1/62	8/4294	0.109923	0.199694	0.138851	C00328	1	C00328(-1.298)	8.66	https://www.kegg.jp/kegg-bin/show_pathway?map=bta05143&multi_query=cpd:C00328+yellow	Infectious disease: parasitic	Human Diseases
bta05215	Prostate cancer	1/62	11/4294	0.148003	0.230461	0.160244	C00410	1	C00410(-0.410)	6.3	https://www.kegg.jp/kegg-bin/show_pathway?map=bta05215&multi_query=cpd:C00410+yellow	Cancer: specific types	Human Diseases
bta04934	Cushing syndrome	1/62	13/4294	0.172494	0.241049	0.167605	C00410	1	C00410(-0.410)	5.33	https://www.kegg.jp/kegg-bin/show_pathway?map=bta04934&multi_query=cpd:C00410+yellow	Endocrine and metabolic disease	Human Diseases
bta04931	Insulin resistance	1/62	19/4294	0.241886	0.310183	0.215675	C00022	1	C00022(-0.669)	3.65	https://www.kegg.jp/kegg-bin/show_pathway?map=bta04931&multi_query=cpd:C00022+yellow	Endocrine and metabolic disease	Human Diseases
bta05012	Parkinson disease	1/62	26/4294	0.315631	0.369933	0.25722	C00082	1	C00082(-0.328)	2.66	https://www.kegg.jp/kegg-bin/show_pathway?map=bta05012&multi_query=cpd:C00082+yellow	Neurodegenerative disease	Human Diseases
bta01240	Biosynthesis of cofactors	12/62	327/4294	0.00207603	0.0221012	0.0153673	C00864/C00522/C00074/C00025/C00120/C00082/C01909/C00438/C00022/C00295/C00328/C01040	12	C00864(7.390)/C00522(3.599)/C00074(-1.618)/C00025(-0.235)/C00120(-1.131)/C00082(-0.328)/C01909(7.854)/C00438(0.499)/C00022(-0.669)/C00295(-0.354)/C00328(-1.298)/C01040(0.343)	2.54	https://www.kegg.jp/kegg-bin/show_pathway?map=bta01240&multi_query=cpd:C00864+purple%0d%0acpd:C00522+purple%0d%0acpd:C00074+yellow%0d%0acpd:C00025+yellow%0d%0acpd:C00120+yellow%0d%0acpd:C00082+yellow%0d%0acpd:C01909+purple%0d%0acpd:C00438+purple%0d%0acpd:C00022+yellow%0d%0acpd:C00295+yellow%0d%0acpd:C00328+yellow%0d%0acpd:C01040+purple	Global and overview maps	Metabolism
bta00240	Pyrimidine metabolism	9/62	65/4294	2.55034e-07	2.77988e-05	1.93289e-05	C00055/C00380/C00299/C00475/C00881/C00106/C00438/C02067/C00295	9	C00055(-1.459)/C00380(-0.386)/C00299(-0.978)/C00475(0.748)/C00881(-0.674)/C00106(-0.879)/C00438(0.499)/C02067(1.876)/C00295(-0.354)	9.59	https://www.kegg.jp/kegg-bin/show_pathway?map=bta00240&multi_query=cpd:C00055+yellow%0d%0acpd:C00380+yellow%0d%0acpd:C00299+yellow%0d%0acpd:C00475+purple%0d%0acpd:C00881+yellow%0d%0acpd:C00106+yellow%0d%0acpd:C00438+purple%0d%0acpd:C02067+purple%0d%0acpd:C00295+yellow	Nucleotide metabolism	Metabolism
bta00330	Arginine and proline metabolism	7/62	78/4294	0.00010963	0.00298742	0.0020772	C00062/C00581/C02305/C00025/C04281/C00022/C00300	7	C00062(-0.702)/C00581(4.995)/C02305(-0.891)/C00025(-0.235)/C04281(0.488)/C00022(-0.669)/C00300(-0.634)	6.22	https://www.kegg.jp/kegg-bin/show_pathway?map=bta00330&multi_query=cpd:C00062+yellow%0d%0acpd:C00581+purple%0d%0acpd:C02305+yellow%0d%0acpd:C00025+yellow%0d%0acpd:C04281+purple%0d%0acpd:C00022+yellow%0d%0acpd:C00300+yellow	Amino acid metabolism	Metabolism
bta01230	Biosynthesis of amino acids	7/62	128/4294	0.0022304	0.0221012	0.0153673	C02504/C00062/C00074/C00025/C00082/C00079/C00022	7	C02504(4.034)/C00062(-0.702)/C00074(-1.618)/C00025(-0.235)/C00082(-0.328)/C00079(-2.501)/C00022(-0.669)	3.79	https://www.kegg.jp/kegg-bin/show_pathway?map=bta01230&multi_query=cpd:C02504+purple%0d%0acpd:C00062+yellow%0d%0acpd:C00074+yellow%0d%0acpd:C00025+yellow%0d%0acpd:C00082+yellow%0d%0acpd:C00079+yellow%0d%0acpd:C00022+yellow	Global and overview maps	Metabolism
bta01200	Carbon metabolism	6/62	114/4294	0.00562372	0.0356267	0.0247718	C00074/C00257/C00025/C00149/C00221/C00022	6	C00074(-1.618)/C00257(0.317)/C00025(-0.235)/C00149(-0.331)/C00221(0.656)/C00022(-0.669)	3.65	https://www.kegg.jp/kegg-bin/show_pathway?map=bta01200&multi_query=cpd:C00074+yellow%0d%0acpd:C00257+purple%0d%0acpd:C00025+yellow%0d%0acpd:C00149+yellow%0d%0acpd:C00221+purple%0d%0acpd:C00022+yellow	Global and overview maps	Metabolism
bta00360	Phenylalanine metabolism	5/62	60/4294	0.00158181	0.0204395	0.0142119	C00082/C01586/C00805/C00079/C00022	5	C00082(-0.328)/C01586(-2.389)/C00805(0.509)/C00079(-2.501)/C00022(-0.669)	5.77	https://www.kegg.jp/kegg-bin/show_pathway?map=bta00360&multi_query=cpd:C00082+yellow%0d%0acpd:C01586+yellow%0d%0acpd:C00805+purple%0d%0acpd:C00079+yellow%0d%0acpd:C00022+yellow	Amino acid metabolism	Metabolism
bta01210	2-Oxocarboxylic acid metabolism	5/62	134/4294	0.0429686	0.1301	0.0904603	C02504/C00025/C00082/C00079/C00022	5	C02504(4.034)/C00025(-0.235)/C00082(-0.328)/C00079(-2.501)/C00022(-0.669)	2.58	https://www.kegg.jp/kegg-bin/show_pathway?map=bta01210&multi_query=cpd:C02504+purple%0d%0acpd:C00025+yellow%0d%0acpd:C00082+yellow%0d%0acpd:C00079+yellow%0d%0acpd:C00022+yellow	Global and overview maps	Metabolism
bta00770	Pantothenate and CoA biosynthesis	4/62	30/4294	0.000815345	0.0148121	0.0102991	C00864/C00522/C00106/C00022	4	C00864(7.390)/C00522(3.599)/C00106(-0.879)/C00022(-0.669)	9.23	https://www.kegg.jp/kegg-bin/show_pathway?map=bta00770&multi_query=cpd:C00864+purple%0d%0acpd:C00522+purple%0d%0acpd:C00106+yellow%0d%0acpd:C00022+yellow	Metabolism of cofactors and vitamins	Metabolism
bta00620	Pyruvate metabolism	4/62	32/4294	0.00104702	0.0163036	0.0113362	C02504/C00074/C00149/C00022	4	C02504(4.034)/C00074(-1.618)/C00149(-0.331)/C00022(-0.669)	8.66	https://www.kegg.jp/kegg-bin/show_pathway?map=bta00620&multi_query=cpd:C02504+purple%0d%0acpd:C00074+yellow%0d%0acpd:C00149+yellow%0d%0acpd:C00022+yellow	Carbohydrate metabolism	Metabolism
bta00260	Glycine, serine and threonine metabolism	4/62	50/4294	0.00552484	0.0356267	0.0247718	C00719/C00581/C00022/C00300	4	C00719(1.241)/C00581(4.995)/C00022(-0.669)/C00300(-0.634)	5.54	https://www.kegg.jp/kegg-bin/show_pathway?map=bta00260&multi_query=cpd:C00719+purple%0d%0acpd:C00581+purple%0d%0acpd:C00022+yellow%0d%0acpd:C00300+yellow	Amino acid metabolism	Metabolism
bta00310	Lysine degradation	4/62	50/4294	0.00552484	0.0356267	0.0247718	C03793/C00489/C01181/C05548	4	C03793(-0.252)/C00489(-0.870)/C01181(0.126)/C05548(0.451)	5.54	https://www.kegg.jp/kegg-bin/show_pathway?map=bta00310&multi_query=cpd:C03793+yellow%0d%0acpd:C00489+yellow%0d%0acpd:C01181+purple%0d%0acpd:C05548+purple	Amino acid metabolism	Metabolism
bta00020	Citrate cycle (TCA cycle)	3/62	20/4294	0.00274337	0.0249189	0.0173265	C00074/C00149/C00022	3	C00074(-1.618)/C00149(-0.331)/C00022(-0.669)	10.39	https://www.kegg.jp/kegg-bin/show_pathway?map=bta00020&multi_query=cpd:C00074+yellow%0d%0acpd:C00149+yellow%0d%0acpd:C00022+yellow	Carbohydrate metabolism	Metabolism
bta00250	Alanine, aspartate and glutamate metabolism	3/62	28/4294	0.00726277	0.0376972	0.0262115	C00025/C00438/C00022	3	C00025(-0.235)/C00438(0.499)/C00022(-0.669)	7.42	https://www.kegg.jp/kegg-bin/show_pathway?map=bta00250&multi_query=cpd:C00025+yellow%0d%0acpd:C00438+purple%0d%0acpd:C00022+yellow	Amino acid metabolism	Metabolism
bta00010	Glycolysis / Gluconeogenesis	3/62	31/4294	0.00966433	0.0438922	0.0305189	C00074/C00221/C00022	3	C00074(-1.618)/C00221(0.656)/C00022(-0.669)	6.7	https://www.kegg.jp/kegg-bin/show_pathway?map=bta00010&multi_query=cpd:C00074+yellow%0d%0acpd:C00221+purple%0d%0acpd:C00022+yellow	Carbohydrate metabolism	Metabolism
bta00400	Phenylalanine, tyrosine and tryptophan biosynthesis	3/62	34/4294	0.0124779	0.0503736	0.0350256	C00074/C00082/C00079	3	C00074(-1.618)/C00082(-0.328)/C00079(-2.501)	6.11	https://www.kegg.jp/kegg-bin/show_pathway?map=bta00400&multi_query=cpd:C00074+yellow%0d%0acpd:C00082+yellow%0d%0acpd:C00079+yellow	Amino acid metabolism	Metabolism
bta00030	Pentose phosphate pathway	3/62	35/4294	0.0135093	0.0525898	0.0365665	C00257/C00221/C00022	3	C00257(0.317)/C00221(0.656)/C00022(-0.669)	5.94	https://www.kegg.jp/kegg-bin/show_pathway?map=bta00030&multi_query=cpd:C00257+purple%0d%0acpd:C00221+purple%0d%0acpd:C00022+yellow	Carbohydrate metabolism	Metabolism
bta00564	Glycerophospholipid metabolism	3/62	56/4294	0.0462588	0.136276	0.0947548	C00588/C00093/C04230	3	C00588(-1.469)/C00093(0.546)/C04230(2.022)	3.71	https://www.kegg.jp/kegg-bin/show_pathway?map=bta00564&multi_query=cpd:C00588+yellow%0d%0acpd:C00093+purple%0d%0acpd:C04230+purple	Lipid metabolism	Metabolism
bta00630	Glyoxylate and dicarboxylate metabolism	3/62	62/4294	0.0594251	0.154591	0.107489	C00025/C00149/C00022	3	C00025(-0.235)/C00149(-0.331)/C00022(-0.669)	3.35	https://www.kegg.jp/kegg-bin/show_pathway?map=bta00630&multi_query=cpd:C00025+yellow%0d%0acpd:C00149+yellow%0d%0acpd:C00022+yellow	Carbohydrate metabolism	Metabolism
bta00380	Tryptophan metabolism	3/62	83/4294	0.117158	0.209142	0.14542	C01717/C05834/C00328	3	C01717(-2.196)/C05834(3.756)/C00328(-1.298)	2.5	https://www.kegg.jp/kegg-bin/show_pathway?map=bta00380&multi_query=cpd:C01717+yellow%0d%0acpd:C05834+purple%0d%0acpd:C00328+yellow	Amino acid metabolism	Metabolism
bta00230	Purine metabolism	3/62	95/4294	0.15686	0.233022	0.162024	C00366/C01444/C05513	3	C00366(-1.599)/C01444(1.299)/C05513(8.624)	2.19	https://www.kegg.jp/kegg-bin/show_pathway?map=bta00230&multi_query=cpd:C00366+yellow%0d%0acpd:C01444+purple%0d%0acpd:C05513+purple	Nucleotide metabolism	Metabolism
bta00220	Arginine biosynthesis	2/62	23/4294	0.0427268	0.1301	0.0904603	C00062/C00025	2	C00062(-0.702)/C00025(-0.235)	6.02	https://www.kegg.jp/kegg-bin/show_pathway?map=bta00220&multi_query=cpd:C00062+yellow%0d%0acpd:C00025+yellow	Amino acid metabolism	Metabolism
bta00290	Valine, leucine and isoleucine biosynthesis	2/62	23/4294	0.0427268	0.1301	0.0904603	C02504/C00022	2	C02504(4.034)/C00022(-0.669)	6.02	https://www.kegg.jp/kegg-bin/show_pathway?map=bta00290&multi_query=cpd:C02504+purple%0d%0acpd:C00022+yellow	Amino acid metabolism	Metabolism
bta00430	Taurine and hypotaurine metabolism	2/62	23/4294	0.0427268	0.1301	0.0904603	C00025/C00022	2	C00025(-0.235)/C00022(-0.669)	6.02	https://www.kegg.jp/kegg-bin/show_pathway?map=bta00430&multi_query=cpd:C00025+yellow%0d%0acpd:C00022+yellow	Metabolism of other amino acids	Metabolism
bta00591	Linoleic acid metabolism	2/62	28/4294	0.0609853	0.154591	0.107489	C14835/C14765	2	C14835(1.716)/C14765(0.724)	4.95	https://www.kegg.jp/kegg-bin/show_pathway?map=bta00591&multi_query=cpd:C14835+purple%0d%0acpd:C14765+purple	Lipid metabolism	Metabolism
bta00780	Biotin metabolism	2/62	28/4294	0.0609853	0.154591	0.107489	C00120/C01909	2	C00120(-1.131)/C01909(7.854)	4.95	https://www.kegg.jp/kegg-bin/show_pathway?map=bta00780&multi_query=cpd:C00120+yellow%0d%0acpd:C01909+purple	Metabolism of cofactors and vitamins	Metabolism
bta00730	Thiamine metabolism	2/62	31/4294	0.0730015	0.169301	0.117718	C00082/C00022	2	C00082(-0.328)/C00022(-0.669)	4.47	https://www.kegg.jp/kegg-bin/show_pathway?map=bta00730&multi_query=cpd:C00082+yellow%0d%0acpd:C00022+yellow	Metabolism of cofactors and vitamins	Metabolism
bta00410	beta-Alanine metabolism	2/62	32/4294	0.0771646	0.171652	0.119352	C00864/C00106	2	C00864(7.390)/C00106(-0.879)	4.33	https://www.kegg.jp/kegg-bin/show_pathway?map=bta00410&multi_query=cpd:C00864+purple%0d%0acpd:C00106+yellow	Metabolism of other amino acids	Metabolism
bta00900	Terpenoid backbone biosynthesis	2/62	45/4294	0.137002	0.229741	0.159743	C00418/C00022	2	C00418(-0.758)/C00022(-0.669)	3.08	https://www.kegg.jp/kegg-bin/show_pathway?map=bta00900&multi_query=cpd:C00418+yellow%0d%0acpd:C00022+yellow	Metabolism of terpenoids and polyketides	Metabolism
bta00650	Butanoate metabolism	2/62	47/4294	0.146948	0.230461	0.160244	C00025/C00022	2	C00025(-0.235)/C00022(-0.669)	2.95	https://www.kegg.jp/kegg-bin/show_pathway?map=bta00650&multi_query=cpd:C00025+yellow%0d%0acpd:C00022+yellow	Carbohydrate metabolism	Metabolism
bta00760	Nicotinate and nicotinamide metabolism	2/62	55/4294	0.188033	0.259437	0.180391	C01020/C00022	2	C01020(1.772)/C00022(-0.669)	2.52	https://www.kegg.jp/kegg-bin/show_pathway?map=bta00760&multi_query=cpd:C01020+purple%0d%0acpd:C00022+yellow	Metabolism of cofactors and vitamins	Metabolism
bta00440	Phosphonate and phosphinate metabolism	2/62	56/4294	0.193283	0.263349	0.183111	C00074/C00022	2	C00074(-1.618)/C00022(-0.669)	2.47	https://www.kegg.jp/kegg-bin/show_pathway?map=bta00440&multi_query=cpd:C00074+yellow%0d%0acpd:C00022+yellow	Metabolism of other amino acids	Metabolism
bta00053	Ascorbate and aldarate metabolism	2/62	57/4294	0.198554	0.263932	0.183516	C00022/C01040	2	C00022(-0.669)/C01040(0.343)	2.43	https://www.kegg.jp/kegg-bin/show_pathway?map=bta00053&multi_query=cpd:C00022+yellow%0d%0acpd:C01040+purple	Carbohydrate metabolism	Metabolism
bta00350	Tyrosine metabolism	2/62	78/4294	0.311261	0.368776	0.256416	C00082/C00022	2	C00082(-0.328)/C00022(-0.669)	1.78	https://www.kegg.jp/kegg-bin/show_pathway?map=bta00350&multi_query=cpd:C00082+yellow%0d%0acpd:C00022+yellow	Amino acid metabolism	Metabolism
bta00520	Amino sugar and nucleotide sugar metabolism	2/62	116/4294	0.503319	0.548617	0.381463	C00270/C00446	2	C00270(0.256)/C00446(-0.395)	1.19	https://www.kegg.jp/kegg-bin/show_pathway?map=bta00520&multi_query=cpd:C00270+purple%0d%0acpd:C00446+yellow	Carbohydrate metabolism	Metabolism
bta00860	Porphyrin and chlorophyll metabolism	2/62	144/4294	0.621795	0.639392	0.44458	C00025/C02800	2	C00025(-0.235)/C02800(0.808)	0.96	https://www.kegg.jp/kegg-bin/show_pathway?map=bta00860&multi_query=cpd:C00025+yellow%0d%0acpd:C02800+purple	Metabolism of cofactors and vitamins	Metabolism
bta00472	D-Arginine and D-ornithine metabolism	1/62	11/4294	0.148003	0.230461	0.160244	C00062	1	C00062(-0.702)	6.3	https://www.kegg.jp/kegg-bin/show_pathway?map=bta00472&multi_query=cpd:C00062+yellow	Metabolism of other amino acids	Metabolism
bta00471	D-Glutamine and D-glutamate metabolism	1/62	13/4294	0.172494	0.241049	0.167605	C00025	1	C00025(-0.235)	5.33	https://www.kegg.jp/kegg-bin/show_pathway?map=bta00471&multi_query=cpd:C00025+yellow	Metabolism of other amino acids	Metabolism
bta00910	Nitrogen metabolism	1/62	19/4294	0.241886	0.310183	0.215675	C00025	1	C00025(-0.235)	3.65	https://www.kegg.jp/kegg-bin/show_pathway?map=bta00910&multi_query=cpd:C00025+yellow	Energy metabolism	Metabolism
bta00740	Riboflavin metabolism	1/62	20/4294	0.252881	0.320512	0.222857	C01727	1	C01727(-0.191)	3.46	https://www.kegg.jp/kegg-bin/show_pathway?map=bta00740&multi_query=cpd:C01727+yellow	Metabolism of cofactors and vitamins	Metabolism
bta00600	Sphingolipid metabolism	1/62	25/4294	0.305545	0.365982	0.254473	C12144	1	C12144(-0.558)	2.77	https://www.kegg.jp/kegg-bin/show_pathway?map=bta00600&multi_query=cpd:C12144+yellow	Lipid metabolism	Metabolism
bta00480	Glutathione metabolism	1/62	38/4294	0.425976	0.483661	0.336297	C00025	1	C00025(-0.235)	1.82	https://www.kegg.jp/kegg-bin/show_pathway?map=bta00480&multi_query=cpd:C00025+yellow	Metabolism of other amino acids	Metabolism
bta00561	Glycerolipid metabolism	1/62	38/4294	0.425976	0.483661	0.336297	C00093	1	C00093(0.546)	1.82	https://www.kegg.jp/kegg-bin/show_pathway?map=bta00561&multi_query=cpd:C00093+purple	Lipid metabolism	Metabolism
bta00640	Propanoate metabolism	1/62	40/4294	0.442581	0.497333	0.345804	C05984	1	C05984(0.834)	1.73	https://www.kegg.jp/kegg-bin/show_pathway?map=bta00640&multi_query=cpd:C05984+purple	Carbohydrate metabolism	Metabolism
bta00052	Galactose metabolism	1/62	46/4294	0.48961	0.544567	0.378646	C00446	1	C00446(-0.395)	1.51	https://www.kegg.jp/kegg-bin/show_pathway?map=bta00052&multi_query=cpd:C00446+yellow	Carbohydrate metabolism	Metabolism
bta00340	Histidine metabolism	1/62	47/4294	0.49706	0.547268	0.380524	C00025	1	C00025(-0.235)	1.47	https://www.kegg.jp/kegg-bin/show_pathway?map=bta00340&multi_query=cpd:C00025+yellow	Amino acid metabolism	Metabolism
bta00071	Fatty acid degradation	1/62	50/4294	0.518771	0.559862	0.389281	C00489	1	C00489(-0.870)	1.39	https://www.kegg.jp/kegg-bin/show_pathway?map=bta00071&multi_query=cpd:C00489+yellow	Lipid metabolism	Metabolism
bta00040	Pentose and glucuronate interconversions	1/62	58/4294	0.572261	0.599774	0.417033	C00022	1	C00022(-0.669)	1.19	https://www.kegg.jp/kegg-bin/show_pathway?map=bta00040&multi_query=cpd:C00022+yellow	Carbohydrate metabolism	Metabolism
bta00061	Fatty acid biosynthesis	1/62	58/4294	0.572261	0.599774	0.417033	C08362	1	C08362(0.393)	1.19	https://www.kegg.jp/kegg-bin/show_pathway?map=bta00061&multi_query=cpd:C08362+purple	Lipid metabolism	Metabolism
bta00270	Cysteine and methionine metabolism	1/62	64/4294	0.608498	0.631678	0.439216	C00022	1	C00022(-0.669)	1.08	https://www.kegg.jp/kegg-bin/show_pathway?map=bta00270&multi_query=cpd:C00022+yellow	Amino acid metabolism	Metabolism
bta00130	Ubiquinone and other terpenoid-quinone biosynthesis	1/62	71/4294	0.646968	0.659061	0.458256	C00082	1	C00082(-0.328)	0.98	https://www.kegg.jp/kegg-bin/show_pathway?map=bta00130&multi_query=cpd:C00082+yellow	Metabolism of cofactors and vitamins	Metabolism
bta00524	Neomycin, kanamycin and gentamicin biosynthesis	1/62	81/4294	0.695553	0.701994	0.488108	C00025	1	C00025(-0.235)	0.86	https://www.kegg.jp/kegg-bin/show_pathway?map=bta00524&multi_query=cpd:C00025+yellow	Biosynthesis of other secondary metabolites	Metabolism
bta00140	Steroid hormone biosynthesis	1/62	99/4294	0.766988	0.766988	0.533299	C00410	1	C00410(-0.410)	0.7	https://www.kegg.jp/kegg-bin/show_pathway?map=bta00140&multi_query=cpd:C00410+yellow	Lipid metabolism	Metabolism
bta04974	Protein digestion and absorption	4/62	47/4294	0.00441896	0.0344048	0.0239222	C00062/C00025/C00082/C00079	4	C00062(-0.702)/C00025(-0.235)/C00082(-0.328)/C00079(-2.501)	5.89	https://www.kegg.jp/kegg-bin/show_pathway?map=bta04974&multi_query=cpd:C00062+yellow%0d%0acpd:C00025+yellow%0d%0acpd:C00082+yellow%0d%0acpd:C00079+yellow	Digestive system	Organismal Systems
bta04964	Proximal tubule bicarbonate reclamation	3/62	17/4294	0.00168767	0.0204395	0.0142119	C00074/C00025/C00149	3	C00074(-1.618)/C00025(-0.235)/C00149(-0.331)	12.22	https://www.kegg.jp/kegg-bin/show_pathway?map=bta04964&multi_query=cpd:C00074+yellow%0d%0acpd:C00025+yellow%0d%0acpd:C00149+yellow	Excretory system	Organismal Systems
bta04922	Glucagon signaling pathway	3/62	26/4294	0.00588331	0.0356267	0.0247718	C00074/C00149/C00022	3	C00074(-1.618)/C00149(-0.331)/C00022(-0.669)	7.99	https://www.kegg.jp/kegg-bin/show_pathway?map=bta04922&multi_query=cpd:C00074+yellow%0d%0acpd:C00149+yellow%0d%0acpd:C00022+yellow	Endocrine system	Organismal Systems
bta04742	Taste transduction	3/62	32/4294	0.0105558	0.0442531	0.0307699	C00025/C00149/C11045	3	C00025(-0.235)/C00149(-0.331)/C11045(5.291)	6.49	https://www.kegg.jp/kegg-bin/show_pathway?map=bta04742&multi_query=cpd:C00025+yellow%0d%0acpd:C00149+yellow%0d%0acpd:C11045+purple	Sensory system	Organismal Systems
bta04976	Bile secretion	3/62	97/4294	0.163852	0.234999	0.163398	C00366/C00805/C00318	3	C00366(-1.599)/C00805(0.509)/C00318(0.108)	2.14	https://www.kegg.jp/kegg-bin/show_pathway?map=bta04976&multi_query=cpd:C00366+yellow%0d%0acpd:C00805+purple%0d%0acpd:C00318+purple	Digestive system	Organismal Systems
bta04917	Prolactin signaling pathway	2/62	11/4294	0.0103756	0.0442531	0.0307699	C00082/C00410	2	C00082(-0.328)/C00410(-0.410)	12.59	https://www.kegg.jp/kegg-bin/show_pathway?map=bta04917&multi_query=cpd:C00082+yellow%0d%0acpd:C00410+yellow	Endocrine system	Organismal Systems
bta04977	Vitamin digestion and absorption	2/62	39/4294	0.108213	0.199694	0.138851	C00864/C00120	2	C00864(7.390)/C00120(-1.131)	3.55	https://www.kegg.jp/kegg-bin/show_pathway?map=bta04977&multi_query=cpd:C00864+purple%0d%0acpd:C00120+yellow	Digestive system	Organismal Systems
bta04914	Progesterone-mediated oocyte maturation	1/62	4/4294	0.0565355	0.154059	0.10712	C00410	1	C00410(-0.410)	17.31	https://www.kegg.jp/kegg-bin/show_pathway?map=bta04914&multi_query=cpd:C00410+yellow	Endocrine system	Organismal Systems
bta04916	Melanogenesis	1/62	6/4294	0.0836118	0.171956	0.119564	C00082	1	C00082(-0.328)	11.54	https://www.kegg.jp/kegg-bin/show_pathway?map=bta04916&multi_query=cpd:C00082+yellow	Endocrine system	Organismal Systems
bta04720	Long-term potentiation	1/62	7/4294	0.0968619	0.188535	0.131091	C00025	1	C00025(-0.235)	9.89	https://www.kegg.jp/kegg-bin/show_pathway?map=bta04720&multi_query=cpd:C00025+yellow	Nervous system	Organismal Systems
bta04724	Glutamatergic synapse	1/62	8/4294	0.109923	0.199694	0.138851	C00025	1	C00025(-0.235)	8.66	https://www.kegg.jp/kegg-bin/show_pathway?map=bta04724&multi_query=cpd:C00025+yellow	Nervous system	Organismal Systems
bta04713	Circadian entrainment	1/62	9/4294	0.122799	0.209142	0.14542	C00025	1	C00025(-0.235)	7.7	https://www.kegg.jp/kegg-bin/show_pathway?map=bta04713&multi_query=cpd:C00025+yellow	Environmental adaptation	Organismal Systems
bta04727	GABAergic synapse	1/62	9/4294	0.122799	0.209142	0.14542	C00025	1	C00025(-0.235)	7.7	https://www.kegg.jp/kegg-bin/show_pathway?map=bta04727&multi_query=cpd:C00025+yellow	Nervous system	Organismal Systems
bta04730	Long-term depression	1/62	9/4294	0.122799	0.209142	0.14542	C00025	1	C00025(-0.235)	7.7	https://www.kegg.jp/kegg-bin/show_pathway?map=bta04730&multi_query=cpd:C00025+yellow	Nervous system	Organismal Systems
bta04721	Synaptic vesicle cycle	1/62	12/4294	0.160336	0.233022	0.162024	C00025	1	C00025(-0.235)	5.77	https://www.kegg.jp/kegg-bin/show_pathway?map=bta04721&multi_query=cpd:C00025+yellow	Nervous system	Organismal Systems
bta04728	Dopaminergic synapse	1/62	12/4294	0.160336	0.233022	0.162024	C00082	1	C00082(-0.328)	5.77	https://www.kegg.jp/kegg-bin/show_pathway?map=bta04728&multi_query=cpd:C00082+yellow	Nervous system	Organismal Systems
bta04911	Insulin secretion	1/62	12/4294	0.160336	0.233022	0.162024	C00022	1	C00022(-0.669)	5.77	https://www.kegg.jp/kegg-bin/show_pathway?map=bta04911&multi_query=cpd:C00022+yellow	Endocrine system	Organismal Systems
bta04927	Cortisol synthesis and secretion	1/62	12/4294	0.160336	0.233022	0.162024	C00410	1	C00410(-0.410)	5.77	https://www.kegg.jp/kegg-bin/show_pathway?map=bta04927&multi_query=cpd:C00410+yellow	Endocrine system	Organismal Systems
bta04723	Retrograde endocannabinoid signaling	1/62	19/4294	0.241886	0.310183	0.215675	C00025	1	C00025(-0.235)	3.65	https://www.kegg.jp/kegg-bin/show_pathway?map=bta04723&multi_query=cpd:C00025+yellow	Nervous system	Organismal Systems
bta04925	Aldosterone synthesis and secretion	1/62	22/4294	0.274402	0.339884	0.236327	C00410	1	C00410(-0.410)	3.15	https://www.kegg.jp/kegg-bin/show_pathway?map=bta04925&multi_query=cpd:C00410+yellow	Endocrine system	Organismal Systems
bta04714	Thermogenesis	1/62	23/4294	0.284933	0.348962	0.242639	C00318	1	C00318(0.108)	3.01	https://www.kegg.jp/kegg-bin/show_pathway?map=bta04714&multi_query=cpd:C00318+purple	Environmental adaptation	Organismal Systems
bta04913	Ovarian steroidogenesis	1/62	24/4294	0.295313	0.357657	0.248684	C00410	1	C00410(-0.410)	2.89	https://www.kegg.jp/kegg-bin/show_pathway?map=bta04913&multi_query=cpd:C00410+yellow	Endocrine system	Organismal Systems
bta04978	Mineral absorption	1/62	29/4294	0.345031	0.400089	0.278189	C00079	1	C00079(-2.501)	2.39	https://www.kegg.jp/kegg-bin/show_pathway?map=bta04978&multi_query=cpd:C00079+yellow	Digestive system	Organismal Systems
