# Supplementary material for: Deciphering the Mechanism by Which Carbon Dioxide Extends the Shelf Life of Raw Milk: A Microbiomics- and Metabolomics-Based Approach
Source: Preprints.org preprint supplement (doi:10.20944/preprints202312.0363.v1), 2023-12-06
Supplement: Supplementary file 3 [file Table S2.xlsx]

## Sheet: Sheet1
KEGGID	Metabolite name	Log 10 QC	Log 10 A_0d	Log 10 A_4d	Log 10 A_6d	Log 10 D_0d	Log 10 D_4d	Log 10 D_6d	Superclass	Class
C00022	Pyruvic acid	8.19178	8.29281	8.31217	8.14214	8.29281	8.18537	8.34363	Organic acids and derivatives	Keto acids and derivatives
C00025	Glutamic acid	8.99595	9.00535	9.01001	8.90765	9.00535	9.02628	8.9783	Organic acids and derivatives	Carboxylic acids and derivatives
C00055	5'-CMP	8.26354	8.44441	8.30362	7.91001	8.44441	8.34364	8.34924	Nucleosides, nucleotides, and analogues	Pyrimidine nucleotides
C00062	Arginine	8.34118	8.30415	8.34841	8.1214	8.30415	8.32718	8.33283	Organic acids and derivatives	Carboxylic acids and derivatives
C00074	2-Propenoic acid, 2-(phosphonooxy)-	7.92801	8.31793	7.91052	7.49622	8.31793	7.96543	7.98334	Organic acids and derivatives	Organic phosphoric acids and derivatives
C00079	Phenylalanine	7.17806	7.07765	8.7928	8.20972	7.07765	8.83508	8.96272	Organic acids and derivatives	Carboxylic acids and derivatives
C00079	Phenylalanine	6.91354	6.95423	7.02758	6.83694	6.95423	6.96688	6.79434	Organic acids and derivatives	Carboxylic acids and derivatives
C00082	Tyrosine	8.83986	8.80965	8.91857	8.8791	8.80965	8.88063	8.97791	Organic acids and derivatives	Carboxylic acids and derivatives
C00082	Tyrosine	6.80176	6.84573	6.82203	6.77454	6.84573	6.87117	6.74735	Organic acids and derivatives	Carboxylic acids and derivatives
C00093	Glycerol 3-phosphate	8.59673	8.60086	8.61029	8.7102	8.60086	8.689	8.54572	Lipids and lipid-like molecules	Glycerophospholipids
C00106	Uracil	9.11486	9.1116	9.28904	9.02523	9.1116	9.21551	9.28972	Organoheterocyclic compounds	Diazines
C00106	Uracil	9.96966	9.90942	9.94971	9.98325	9.90942	9.95135	9.97909	Organoheterocyclic compounds	Diazines
C00120	Biotin	7.30583	7.38401	7.25389	6.99276	7.38401	7.25704	7.20273	Organoheterocyclic compounds	Biotin and derivatives
C00120	Biotin	5.63643	5.71238	7.56805	7.34035	5.71238	7.44786	7.68094	Organoheterocyclic compounds	Biotin and derivatives
C00149	Malate	9.10632	9.08903	9.07809	9.01188	9.08903	9.0425	9.11149	Organic acids and derivatives	Hydroxy acids and derivatives
C00221	beta-D-Glucose	9.16935	8.86162	8.65083	8.51194	8.86162	8.28378	8.31445	Organic oxygen compounds	Organooxygen compounds
C00257	Gluconic acid	8.99956	8.95175	8.95704	9.07463	8.95175	8.97781	8.97907	Organic oxygen compounds	Organooxygen compounds
C00270	N-Acetylneuraminic acid	8.68038	8.60443	8.61247	8.62115	8.60443	8.65037	8.56791	Organic oxygen compounds	Organooxygen compounds
C00270	N-Acetylneuraminic acid	9.31771	9.2934	9.29021	9.34549	9.2934	9.29903	9.26849	Organic oxygen compounds	Organooxygen compounds
C00270	N-Acetylneuraminic acid	8.20848	8.25705	8.30492	8.28534	8.25705	8.35306	8.28306	Organic oxygen compounds	Organooxygen compounds
C00295	Orotic acid	9.42749	9.47692	9.51305	9.53112	9.47692	9.56113	9.63769	Organoheterocyclic compounds	Diazines
C00295	Orotic acid	10.1296	10.0669	10.0766	10.0789	10.0669	10.0518	10.1236	Organoheterocyclic compounds	Diazines
C00299	Uridine	9.3276	9.34332	9.35409	9.24942	9.34332	9.35316	9.32721	Nucleosides, nucleotides, and analogues	Pyrimidine nucleosides
C00299	Uridine	8.55407	8.60454	8.67107	8.42477	8.60454	8.50748	8.71904	Nucleosides, nucleotides, and analogues	Pyrimidine nucleosides
C00299	Uridine	8.4129	8.37066	8.50755	8.35443	8.37066	8.4771	8.50728	Nucleosides, nucleotides, and analogues	Pyrimidine nucleosides
C00300	Creatine	9.97728	9.97813	10.0301	10.0248	9.97813	9.93495	9.9965	Organic acids and derivatives	Carboxylic acids and derivatives
C00300	Creatine	7.85949	8.04737	8.45514	8.44969	8.04737	8.42296	8.64065	Organic acids and derivatives	Carboxylic acids and derivatives
C00328	Kynurenine	6.08726	6.00126	7.92917	7.55576	6.00126	7.6429	7.94652	Organic oxygen compounds	Organooxygen compounds
C00366	Uric Acid	9.48894	9.75528	9.59639	9.24375	9.75528	9.62612	9.72507	Organoheterocyclic compounds	Imidazopyrimidines
C00366	Uric Acid	9.20973	9.31003	9.13509	8.89758	9.31003	9.25116	9.26634	Organoheterocyclic compounds	Imidazopyrimidines
C00380	Cytosine	8.10602	8.52539	8.25269	8.2652	8.52539	8.48906	8.38134	Organoheterocyclic compounds	Diazines
C00380	Cytosine	7.88572	7.79702	7.75728	7.62057	7.79702	7.67523	7.57864	Organoheterocyclic compounds	Diazines
C00410	Progesterone	7.14814	7.10384	7.37011	7.50852	7.10384	7.51624	7.63194	Lipids and lipid-like molecules	Steroids and steroid derivatives
C00418	Mevalonic acid	6.86945	6.90188	7.51301	7.38865	6.90188	7.71042	7.61694	Lipids and lipid-like molecules	Fatty Acyls
C00438	N-Carbamoylaspartic acid	8.19303	8.0503	8.21027	8.28277	8.0503	8.17005	8.13252	Organic acids and derivatives	Carboxylic acids and derivatives
C00446	Galactose 1-phosphate	8.90675	9.01618	8.93003	8.80127	9.01618	9.03146	8.9201	Organic oxygen compounds	Organooxygen compounds
C00475	Cytidine	8.93793	8.67145	8.98322	9.1064	8.67145	8.76077	8.88131	Nucleosides, nucleotides, and analogues	Pyrimidine nucleosides
C00475	Cytidine	7.54376	7.45126	7.70509	7.69278	7.45126	7.59428	7.49126	Nucleosides, nucleotides, and analogues	Pyrimidine nucleosides
C00489	Glutaric acid	7.96038	8.18157	8.11573	8.20057	8.18157	8.33443	8.1351	Organic acids and derivatives	Carboxylic acids and derivatives
C00489	Glutaric acid	8.86554	8.77932	8.74751	8.64228	8.77932	8.83176	8.90408	Organic acids and derivatives	Carboxylic acids and derivatives
C00489	Glutaric acid	7.91882	8.06913	8.0771	8.24503	8.06913	8.27801	7.3427	Organic acids and derivatives	Carboxylic acids and derivatives
C00522	Pantoic acid	7.43573	5.99357	5.8911	7.0611	5.99357	5.94782	5.97781	Lipids and lipid-like molecules	Fatty Acyls
C00581	Glycocyamine	9.04072	9.02253	8.00955	8.66357	9.02253	8.87524	7.64372	Organic acids and derivatives	Carboxylic acids and derivatives
C00581	Glycocyamine	7.5754	5.47646	5.99837	7.51286	5.47646	6.10193	6.00922	Organic acids and derivatives	Carboxylic acids and derivatives
C00588	Phosphorylcholine	9.26061	9.32583	9.17859	8.9269	9.32583	9.22821	9.36908	Organic nitrogen compounds	Organonitrogen compounds
C00588	Phosphocholine	7.82511	7.85919	7.79275	7.90407	7.85919	7.96904	7.8443	Organic nitrogen compounds	Organonitrogen compounds
C00719	Trimethyl glycine	9.29322	9.26955	9.17629	9.58327	9.26955	9.30612	9.20971	Organic acids and derivatives	Carboxylic acids and derivatives
C00805	Salicylic acid	7.47288	7.50057	7.4904	7.67263	7.50057	7.67319	7.51955	Benzenoids	Benzene and substituted derivatives
C00864	Pantothenic acid	6.99238	6.71233	8.20376	7.87277	6.71233	8.07463	8.16735	Organic oxygen compounds	Organooxygen compounds
C00864	Pantothenic acid	9.62594	8.96943	9.22306	9.83941	8.96943	9.73948	7.61468	Organic oxygen compounds	Organooxygen compounds
C00881	Deoxycytidine	8.06335	8.1026	8.08856	7.85575	8.1026	8.01842	8.0585	Nucleosides, nucleotides, and analogues	Pyrimidine nucleosides
C01020	6-Hydroxynicotinic acid	7.74995	7.1333	7.35508	8.20877	7.1333	7.42969	7.67532	Organoheterocyclic compounds	Pyridines and derivatives
C01181	Deoxycarnitine	9.10453	9.19951	9.12503	9.20194	9.19951	9.23626	9.16389	Lipids and lipid-like molecules	Fatty Acyls
C01444	Oxamic acid	7.5396	7.67444	7.75936	7.88517	7.67444	7.87142	7.49407	Organic acids and derivatives	Carboxylic acids and derivatives
C01586	Hippuric acid	7.1752	7.39758	9.62402	9.16844	7.39758	9.0857	9.88761	Benzenoids	Benzene and substituted derivatives
C01586	Hippuric acid	10.018	9.98556	9.98912	9.97084	9.98556	10.0342	9.88372	Benzenoids	Benzene and substituted derivatives
C01717	Transtorine	5.72865	5.73698	7.24528	6.97742	5.73698	6.88705	7.63833	Organoheterocyclic compounds	Quinolines and derivatives
C01909	Dethiobiotin	7.75326	7.42493	6.91457	7.45524	7.42493	7.4234	6.72778	Lipids and lipid-like molecules	Fatty Acyls
C01909	Desthiobiotin	7.94413	7.25546	7.67271	7.97124	7.25546	7.70689	5.60707	Lipids and lipid-like molecules	Fatty Acyls
C02067	Pseudouridine	7.30851	7.55973	7.82419	7.73325	7.55973	7.75946	7.16858	Nucleosides, nucleotides, and analogues	Nucleoside and nucleotide analogues
C02305	Phosphocreatine	8.73115	8.92397	8.75206	8.51658	8.92397	8.89124	8.78485	Organic acids and derivatives	Carboxylic acids and derivatives
C02504	2-Isopropylmalic acid	7.74421	6.94598	7.20431	8.21334	6.94598	7.04862	6.99897	Lipids and lipid-like molecules	Fatty Acyls
C02800	gamma-delta-Dioxovaleric acid	8.33303	8.35954	8.54352	8.64887	8.35954	8.41795	8.40565	Organic acids and derivatives	Keto acids and derivatives
C03690	14C -dehp	7.08259	6.75087	7.29725	7.61562	6.75087	7.65157	6.62289	Benzenoids	Benzene and substituted derivatives
C03793	N6,N6,N6-Trimethyl-L-lysine	8.38646	8.23592	8.37729	8.2332	8.23592	8.35142	8.30898	Organic acids and derivatives	Carboxylic acids and derivatives
C04230	LPC(18:1)	8.1679	7.43031	8.07794	8.33088	7.43031	7.9779	7.72231	Lipids and lipid-like molecules	Glycerophospholipids
C04281	(3R,5S)-1-pyrroline-3-hydroxy-5-carboxylic Acid	8.09171	8.03731	8.12861	8.22513	8.03731	8.13822	8.07808	Organic acids and derivatives	Carboxylic acids and derivatives
C05513	beta-D-3-Ribofuranosyluric acid	7.63346	7.29795	7.10609	7.54695	7.29795	7.20454	4.94852	Organoheterocyclic compounds	Imidazopyrimidines
C05548	2-Keto-6-acetamidocaproate	7.94208	7.75585	7.91257	7.76179	7.75585	7.86175	7.56347	Organic acids and derivatives	Keto acids and derivatives
C05548	2-Keto-6-acetamidocaproate	7.92688	7.88742	7.90692	7.9801	7.88742	7.98703	7.84436	Organic acids and derivatives	Keto acids and derivatives
C05834	3-Methyldioxyindole	8.19684	8.02673	7.67472	8.09952	8.02673	7.95224	6.96894	Organoheterocyclic compounds	Indoles and derivatives
C05984	2-Hydroxybutyric acid, (+)-	8.33316	8.1971	8.25331	8.51252	8.1971	8.27679	8.26133	Organic acids and derivatives	Hydroxy acids and derivatives
C08362	Palmitoleic acid	7.45658	7.22355	7.6779	7.70417	7.22355	7.50704	7.58584	Lipids and lipid-like molecules	Fatty Acyls
C08362	Palmitoleic acid	8.00932	7.97307	7.77064	7.7626	7.97307	7.74363	7.60632	Lipids and lipid-like molecules	Fatty Acyls
C14240	Bis(2-ethylhexyl)hexanedioate	6.68421	6.74175	6.97294	6.81691	6.74175	7.81967	7.66857	Lipids and lipid-like molecules	Fatty Acyls
